# Supplementary material for: Reaction of lithium hexamethyldisilazide (LiHMDS) with water at ultracold conditions
Source: Royal Society of Chemistry journal article supplement (doi:10.1039/d2cp03372k), 2022-01-01
Supplement: d2cp03372k1.pdf [file d2cp03372k1.pdf]

## Supporting Information for

### LiHMDS reacts with water at ultracold conditions

Svenja Jäger<sup>a‡</sup>, Philipp Meyer<sup>\*a‡</sup>, Kai-Stephan Feichtner<sup>b</sup>, Viktoria H. Gessner<sup>b</sup>, Stefan Henkel<sup>a</sup>, Gerhard W. Schwaab<sup>a</sup>, Viktoria H. Gessner<sup>b\*</sup> and Martina Havenith-Newen<sup>a\*</sup>

---

<sup>a</sup> *a Lehrstuhl für Physikalische Chemie II, Ruhr-Universität Bochum, 44780 Bochum, Germany*

<sup>b</sup> *b Lehrstuhl für Anorganische Chemie II, Ruhr-Universität Bochum, 44780 Bochum, Germany*

<sup>c</sup> *‡ These authors contributed equally to this work.*

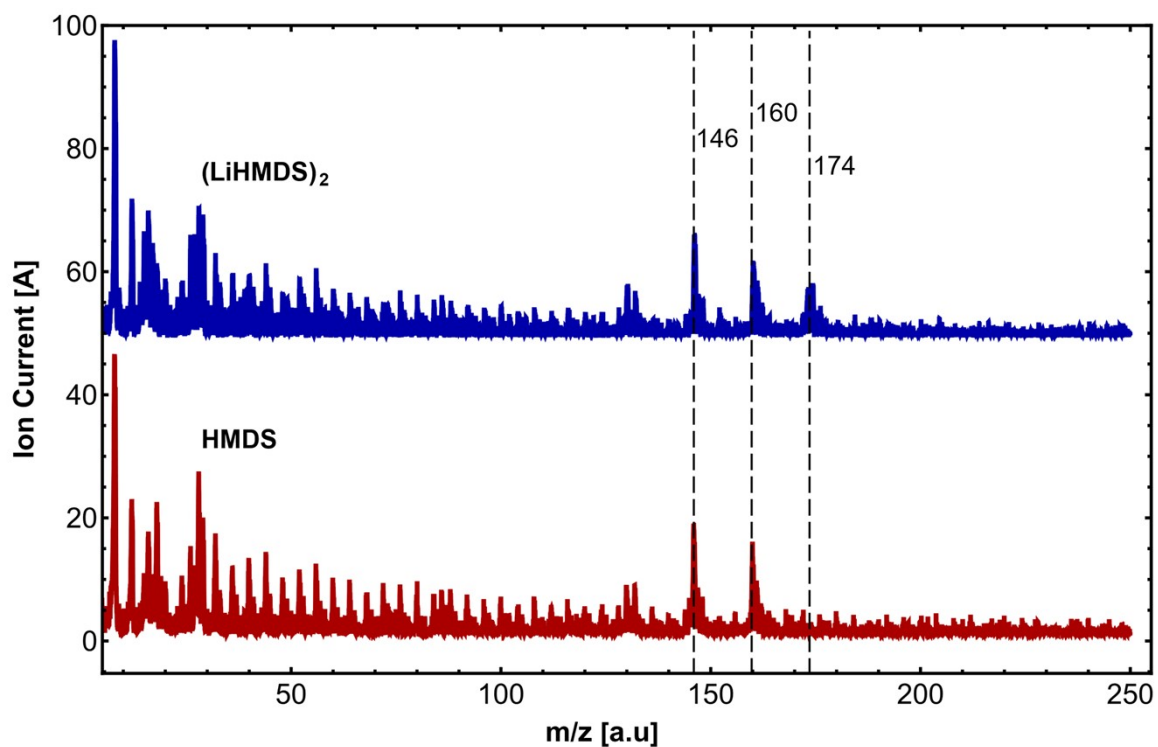

Figure S1. Mass spectra of HMDS and  $(\text{LiHMDS})_2$  in superfluid helium droplets. The nozzle was cooled to 14 K.

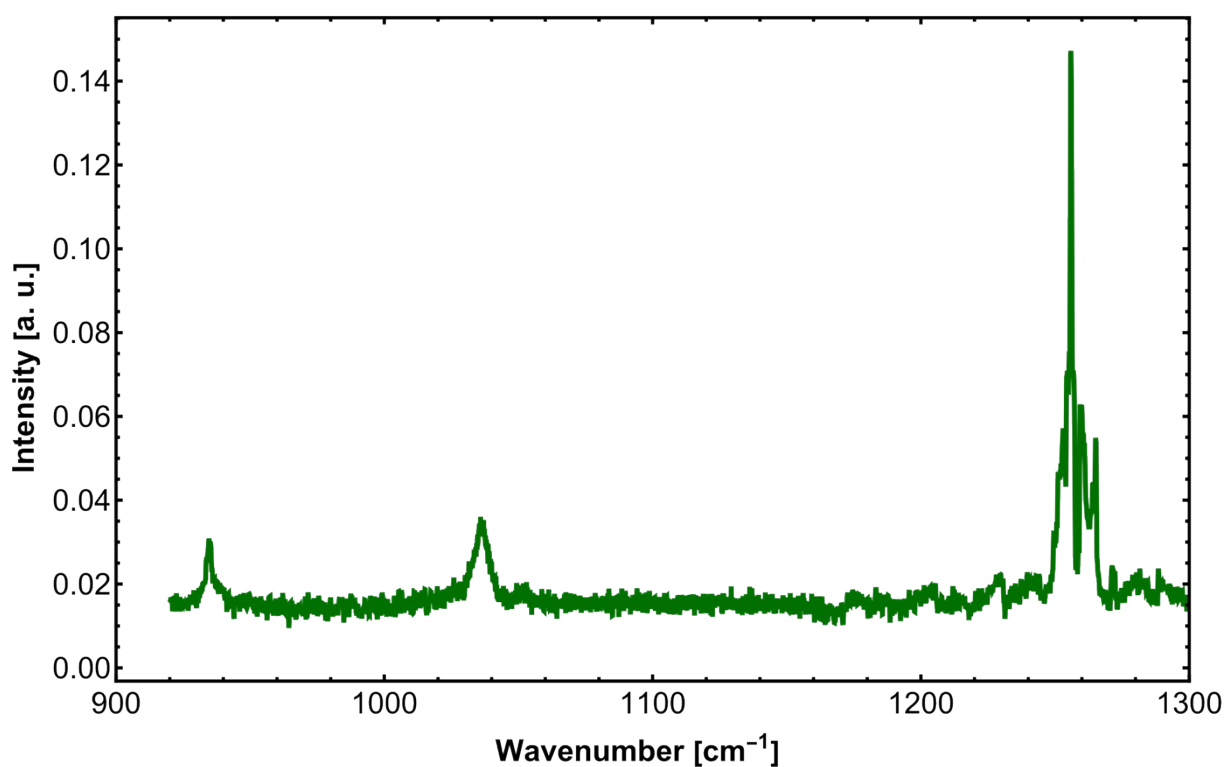

Figure S2. Experimental spectrum of HMDS- $d_1$ , 900-1300  $\text{cm}^{-1}$ .

Computational data for the calculated molecular structures.

|                                                                                          |                                                                                                                                              |
|------------------------------------------------------------------------------------------|----------------------------------------------------------------------------------------------------------------------------------------------|
| <b>H<sub>2</sub>O</b><br>C2v<br>B3LYP-D3/def2-TZVP<br>E = -76.4630039<br>ZPVE = 0.021170 | O            0.000000   0.000000   0.116878<br>H            0.000000   0.765086   -0.467514<br>H            0.000000   -0.765086   -0.467514 |
|------------------------------------------------------------------------------------------|----------------------------------------------------------------------------------------------------------------------------------------------|

|                                                                                                |                                                                                                                                                                                                                                                                                                                                                                                                                                                                                                                                                                                                                                                                                                                                                                                                                                                                                                                                                                                                                                                                                                                                                                                                                                                                                                                                                                                                                                                                                                                                                                                                                                                                                                                                                                                                                                                                                                                                                                                                                                                                                                                                                                                                                                                                                                                                                                                                                                                                                                                                                                                                                                                                                                                                                                       |
|------------------------------------------------------------------------------------------------|-----------------------------------------------------------------------------------------------------------------------------------------------------------------------------------------------------------------------------------------------------------------------------------------------------------------------------------------------------------------------------------------------------------------------------------------------------------------------------------------------------------------------------------------------------------------------------------------------------------------------------------------------------------------------------------------------------------------------------------------------------------------------------------------------------------------------------------------------------------------------------------------------------------------------------------------------------------------------------------------------------------------------------------------------------------------------------------------------------------------------------------------------------------------------------------------------------------------------------------------------------------------------------------------------------------------------------------------------------------------------------------------------------------------------------------------------------------------------------------------------------------------------------------------------------------------------------------------------------------------------------------------------------------------------------------------------------------------------------------------------------------------------------------------------------------------------------------------------------------------------------------------------------------------------------------------------------------------------------------------------------------------------------------------------------------------------------------------------------------------------------------------------------------------------------------------------------------------------------------------------------------------------------------------------------------------------------------------------------------------------------------------------------------------------------------------------------------------------------------------------------------------------------------------------------------------------------------------------------------------------------------------------------------------------------------------------------------------------------------------------------------------------|
| <b>(LiHMDS)<sub>2</sub></b><br>D2<br>B3LYP-D3/def2-TZVP<br>E = -1762.300166<br>ZPVE = 0.458242 | N            0.000000   1.583977   -0.000002<br>Li           0.000000   0.000000   1.144532<br>Si           -1.317676   2.357673   0.758492<br>Si           1.317674   2.357680   -0.758494<br>C           -0.845307   3.865174   1.790721<br>H           -0.442639   4.667371   1.167617<br>H           -1.712055   4.267235   2.322239<br>H           -0.084621   3.612395   2.533703<br>C           -2.676938   2.885784   -0.435262<br>H           -3.065383   2.039586   -1.007007<br>H           -3.517731   3.350226   0.086917<br>H           -2.285735   3.613338   -1.151044<br>C           -2.078841   1.097337   1.971012<br>H           -1.405692   0.838432   2.799714<br>H           -2.970328   1.517134   2.441814<br>H           -2.394246   0.170677   1.481191<br>C           0.845301   3.865183   -1.790718<br>H           0.084625   3.612404   -2.533710<br>H           0.442621   4.667372   -1.167612<br>H           1.712050   4.267257   -2.322225<br>C           2.676927   2.885795   0.435268<br>H           2.285722   3.613354   1.151044<br>H           3.065368   2.039600   1.007019<br>H           3.517725   3.350233   -0.086908<br>C           2.078845   1.097351   -1.971016<br>H           2.970325   1.517157   -2.441824<br>H           2.394257   0.170692   -1.481198<br>H           1.405690   0.838447   -2.799713<br>N           0.000000   -1.583977   -0.000002<br>Li           0.000000   0.000000   -1.144537<br>Si           1.317676   -2.357673   0.758492<br>Si           -1.317674   -2.357680   -0.758494<br>C           2.676938   -2.885784   -0.435262<br>H           3.065383   -2.039586   -1.007007<br>H           3.517731   -3.350226   0.086917<br>H           2.285735   -3.613338   -1.151044<br>C           2.078841   -1.097337   1.971012<br>H           1.405692   -0.838432   2.799714<br>H           2.970328   -1.517134   2.441814<br>H           2.394246   -0.170677   1.481191<br>C           -0.845301   -3.865183   -1.790718<br>H           -0.084625   -3.612404   -2.533710<br>H           -0.442621   -4.667372   -1.167612<br>H           -1.712050   -4.267257   -2.322225<br>C           -2.676927   -2.885795   0.435268<br>H           -2.285722   -3.613354   1.151044<br>H           -3.065368   -2.039600   1.007019<br>H           -3.517725   -3.350233   -0.086908<br>C           -2.078845   -1.097351   -1.971016<br>H           -2.970325   -1.517157   -2.441824<br>H           -2.394257   -0.170692   -1.481198<br>H           -1.405690   -0.838447   -2.799713<br>C           0.845307   -3.865174   1.790721<br>H           0.442639   -4.667371   1.167617<br>H           1.712055   -4.267235   2.322239<br>H           0.084621   -3.612395   2.533703 |
|------------------------------------------------------------------------------------------------|-----------------------------------------------------------------------------------------------------------------------------------------------------------------------------------------------------------------------------------------------------------------------------------------------------------------------------------------------------------------------------------------------------------------------------------------------------------------------------------------------------------------------------------------------------------------------------------------------------------------------------------------------------------------------------------------------------------------------------------------------------------------------------------------------------------------------------------------------------------------------------------------------------------------------------------------------------------------------------------------------------------------------------------------------------------------------------------------------------------------------------------------------------------------------------------------------------------------------------------------------------------------------------------------------------------------------------------------------------------------------------------------------------------------------------------------------------------------------------------------------------------------------------------------------------------------------------------------------------------------------------------------------------------------------------------------------------------------------------------------------------------------------------------------------------------------------------------------------------------------------------------------------------------------------------------------------------------------------------------------------------------------------------------------------------------------------------------------------------------------------------------------------------------------------------------------------------------------------------------------------------------------------------------------------------------------------------------------------------------------------------------------------------------------------------------------------------------------------------------------------------------------------------------------------------------------------------------------------------------------------------------------------------------------------------------------------------------------------------------------------------------------------|

**1**  
C1  
B3LYP-D3/def2-TZVP  
E = -1838.789508  
ZPVE = 0.483154

|    |           |           |           |
|----|-----------|-----------|-----------|
| N  | 1.566069  | 0.002389  | -0.120993 |
| Li | -0.024127 | -0.029027 | 1.125805  |
| Si | 2.540388  | 1.321154  | 0.367933  |
| Si | 2.151154  | -1.461250 | -0.772691 |
| N  | -1.630485 | 0.051541  | -0.042145 |
| Li | -0.060770 | 0.107717  | -1.197101 |
| Si | -2.627657 | -1.286669 | 0.338336  |
| Si | -2.234406 | 1.585151  | -0.500555 |
| O  | 0.755256  | -0.620035 | 2.798618  |
| H  | 0.468423  | -1.168376 | 3.535651  |
| H  | 1.606246  | -0.965966 | 2.497634  |
| C  | -0.989284 | 2.343978  | -1.734730 |
| H  | 0.033335  | 2.421090  | -1.353922 |
| H  | -0.963734 | 1.789530  | -2.682062 |
| H  | -1.292665 | 3.360634  | -1.994309 |
| C  | -3.881973 | 1.577764  | -1.422625 |
| H  | -4.690775 | 1.161384  | -0.818468 |
| H  | -4.166730 | 2.598513  | -1.692474 |
| H  | -3.821672 | 0.993378  | -2.343483 |
| C  | -2.421172 | 2.773716  | 0.951362  |
| H  | -2.731464 | 3.769897  | 0.624489  |
| H  | -3.182464 | 2.398239  | 1.640713  |
| H  | -1.492031 | 2.883054  | 1.514402  |
| C  | -3.486961 | -2.031859 | -1.169578 |
| H  | -4.185055 | -1.326871 | -1.624722 |
| H  | -2.757769 | -2.315026 | -1.933916 |
| H  | -4.049184 | -2.930144 | -0.899707 |
| C  | -1.602202 | -2.695000 | 1.086449  |
| H  | -0.847235 | -3.071702 | 0.393735  |
| H  | -1.092483 | -2.403065 | 2.008072  |
| H  | -2.259492 | -3.532157 | 1.335504  |
| C  | -3.956808 | -0.876881 | 1.619858  |
| H  | -4.551475 | -1.759263 | 1.871577  |
| H  | -3.505082 | -0.503987 | 2.543425  |
| H  | -4.645382 | -0.108099 | 1.261074  |
| C  | 2.365368  | -2.807931 | 0.540201  |
| H  | 3.119348  | -2.505939 | 1.274833  |
| H  | 1.431599  | -3.011123 | 1.069702  |
| H  | 2.705330  | -3.750675 | 0.103557  |
| C  | 3.781145  | -1.356084 | -1.717419 |
| H  | 4.608118  | -1.032582 | -1.081765 |
| H  | 4.045844  | -2.334968 | -2.126731 |
| H  | 3.711592  | -0.654795 | -2.552082 |
| C  | 0.874396  | -2.093472 | -2.039660 |
| H  | -0.139599 | -2.191723 | -1.639638 |
| H  | 0.833409  | -1.448551 | -2.926478 |
| H  | 1.155847  | -3.084635 | -2.402525 |
| C  | 3.303028  | 2.262879  | -1.078754 |
| H  | 3.845879  | 3.149031  | -0.738854 |
| H  | 4.003532  | 1.635667  | -1.633979 |
| H  | 2.531339  | 2.595365  | -1.778425 |
| C  | 1.505351  | 2.565667  | 1.349689  |
| H  | 0.736512  | 3.046096  | 0.741974  |
| H  | 1.018363  | 2.109001  | 2.216916  |
| H  | 2.151794  | 3.358892  | 1.734673  |
| C  | 3.953359  | 0.809436  | 1.522822  |
| H  | 4.611931  | 0.067726  | 1.065358  |
| H  | 4.568338  | 1.672606  | 1.791763  |
| H  | 3.572892  | 0.385574  | 2.457373  |

**2**  
**C1**  
 B3LYP-D3/def2-TZVP  
 E = -1838.789715  
 ZPVE = 0.480941

|    |           |           |           |
|----|-----------|-----------|-----------|
| N  | -1.756567 | -0.078583 | -0.067423 |
| Li | 0.069624  | 0.002962  | 0.585802  |
| Li | 1.044059  | -0.070497 | -1.956794 |
| N  | 1.872497  | 0.107991  | -0.230740 |
| Si | 2.864690  | -1.291511 | -0.218739 |
| Si | -2.722141 | 1.338047  | -0.235817 |
| Si | -2.306430 | -1.593129 | 0.527177  |
| Si | 2.277030  | 1.657906  | 0.383723  |
| O  | -0.664977 | -0.385669 | -2.376417 |
| H  | -1.211430 | -0.291412 | -1.433611 |
| H  | -1.222452 | -0.828857 | -3.018302 |
| C  | -4.283073 | 1.015877  | -1.251369 |
| H  | -4.024715 | 0.648693  | -2.248526 |
| H  | -4.872002 | 1.928270  | -1.377902 |
| H  | -4.928020 | 0.269100  | -0.782350 |
| C  | -3.243822 | 2.075517  | 1.420636  |
| H  | -3.923984 | 1.414831  | 1.961226  |
| H  | -3.754493 | 3.031497  | 1.275258  |
| H  | -2.379088 | 2.257829  | 2.063996  |
| C  | -1.741263 | 2.657744  | -1.163133 |
| H  | -1.363014 | 2.261470  | -2.108199 |
| H  | -0.890526 | 3.029025  | -0.588413 |
| H  | -2.376984 | 3.517696  | -1.389660 |
| C  | 0.987168  | 2.134370  | 1.699606  |
| H  | 1.054401  | 1.478706  | 2.574801  |
| H  | -0.047878 | 2.124210  | 1.344430  |
| H  | 1.165773  | 3.151630  | 2.056106  |
| C  | 2.235720  | 2.966523  | -0.974860 |
| H  | 3.020107  | 2.770041  | -1.711682 |
| H  | 2.407684  | 3.968678  | -0.573301 |
| H  | 1.277461  | 2.988084  | -1.499832 |
| C  | 3.950484  | 1.804077  | 1.240059  |
| H  | 4.036377  | 2.785134  | 1.715303  |
| H  | 4.776283  | 1.708377  | 0.532980  |
| H  | 4.084536  | 1.048553  | 2.017563  |
| C  | 4.617452  | -1.011867 | -0.864696 |
| H  | 5.221748  | -0.430687 | -0.166629 |
| H  | 4.613591  | -0.481761 | -1.821264 |
| H  | 5.122931  | -1.969266 | -1.018910 |
| C  | 2.089846  | -2.562747 | -1.401471 |
| H  | 2.129941  | -2.244871 | -2.451018 |
| H  | 1.047758  | -2.793880 | -1.169248 |
| H  | 2.650524  | -3.499630 | -1.353304 |
| C  | 3.029692  | -2.096152 | 1.479058  |
| H  | 2.065281  | -2.395319 | 1.893893  |
| H  | 3.493485  | -1.402731 | 2.185349  |
| H  | 3.661518  | -2.987225 | 1.431254  |
| C  | -0.887716 | -2.419309 | 1.479724  |
| H  | -0.569397 | -1.831936 | 2.348612  |
| H  | -0.012440 | -2.602546 | 0.851862  |
| H  | -1.201824 | -3.392880 | 1.864240  |
| C  | -2.771393 | -2.758150 | -0.882479 |
| H  | -3.588216 | -2.339133 | -1.476226 |
| H  | -3.094860 | -3.734709 | -0.513252 |
| H  | -1.920191 | -2.919238 | -1.549267 |
| C  | -3.761513 | -1.508273 | 1.723114  |
| H  | -4.646999 | -1.061704 | 1.266206  |
| H  | -3.513682 | -0.921861 | 2.610615  |
| H  | -4.033525 | -2.514127 | 2.054717  |

**3**  
C1  
B3LYP-D3/def2-TZVP  
E = -1838.794209  
ZPVE = 0.482703

|    |           |           |           |
|----|-----------|-----------|-----------|
| N  | 1.850597  | -0.113332 | 0.159642  |
| Li | -1.087257 | 0.111094  | 2.044406  |
| Si | 2.853587  | 1.326812  | 0.178748  |
| Si | 2.231646  | -1.709891 | -0.452403 |
| C  | 4.431908  | 1.042635  | 1.160020  |
| H  | 5.061390  | 0.268648  | 0.716810  |
| H  | 5.024962  | 1.959028  | 1.219075  |
| H  | 4.191201  | 0.735242  | 2.180786  |
| C  | 3.288180  | 1.843862  | -1.575606 |
| H  | 2.396252  | 1.944873  | -2.198723 |
| H  | 3.790940  | 2.814550  | -1.564058 |
| H  | 3.959896  | 1.134198  | -2.061021 |
| C  | 1.875033  | 2.681137  | 1.030702  |
| H  | 1.430846  | 2.278111  | 1.944098  |
| H  | 2.524259  | 3.518920  | 1.296585  |
| H  | 1.070769  | 3.076088  | 0.407519  |
| C  | 3.856268  | -1.791396 | -1.388629 |
| H  | 3.847117  | -1.156794 | -2.276381 |
| H  | 4.706501  | -1.499157 | -0.770552 |
| H  | 4.027886  | -2.818658 | -1.721148 |
| C  | 2.220287  | -2.916139 | 0.977410  |
| H  | 3.088272  | -2.755507 | 1.621482  |
| H  | 1.327566  | -2.760676 | 1.587164  |
| H  | 2.238336  | -3.953796 | 0.636333  |
| C  | 0.873336  | -2.175817 | -1.685495 |
| H  | 1.049695  | -3.174250 | -2.092848 |
| H  | -0.125715 | -2.207577 | -1.241566 |
| H  | 0.850342  | -1.485880 | -2.535481 |
| N  | -1.879763 | 0.128593  | 0.248938  |
| Li | -0.066334 | 0.004253  | -0.437461 |
| Si | -2.878435 | -1.265818 | 0.202589  |
| Si | -2.246711 | 1.681808  | -0.372361 |
| C  | -3.211514 | -1.904772 | -1.544758 |
| H  | -2.287934 | -2.114158 | -2.089855 |
| H  | -3.793125 | -2.830369 | -1.515294 |
| H  | -3.781446 | -1.178845 | -2.129245 |
| C  | -2.036626 | -2.666712 | 1.159246  |
| H  | -1.850056 | -2.410760 | 2.206822  |
| H  | -2.675413 | -3.554001 | 1.156135  |
| H  | -1.075027 | -2.954977 | 0.729366  |
| C  | -3.930484 | 1.895166  | -1.192208 |
| H  | -4.091423 | 1.179121  | -2.000542 |
| H  | -4.744394 | 1.778805  | -0.474134 |
| H  | -4.009763 | 2.898839  | -1.619004 |
| C  | -2.112712 | 3.002266  | 0.970397  |
| H  | -2.885829 | 2.855233  | 1.730479  |
| H  | -1.141077 | 2.982632  | 1.471090  |
| H  | -2.246153 | 4.006703  | 0.559778  |
| C  | -0.960039 | 2.101480  | -1.714929 |
| H  | -1.103259 | 3.120406  | -2.082861 |
| H  | 0.079131  | 2.060179  | -1.371265 |
| H  | -1.060430 | 1.433517  | -2.576775 |
| C  | -4.562427 | -1.009747 | 1.021041  |
| H  | -5.170548 | -0.284782 | 0.476927  |
| H  | -5.121623 | -1.948724 | 1.056890  |
| H  | -4.458274 | -0.649236 | 2.048495  |
| H  | 1.434924  | -0.194025 | 1.147844  |
| O  | 0.540041  | -0.158018 | 2.506944  |
| H  | 1.037335  | -0.374188 | 3.295470  |

**4**  
C1  
B3LYP-D3/def2-TZVP  
E = -1838.809379  
ZPVE = 0.484533

|    |           |           |           |
|----|-----------|-----------|-----------|
| N  | -1.980484 | -0.229647 | -0.452225 |
| Li | 0.050768  | 0.121701  | -0.931841 |
| Li | 1.808191  | 0.701251  | -2.335199 |
| N  | 2.040573  | 0.254678  | -0.464217 |
| Si | 2.242403  | 1.597675  | 0.573938  |
| Si | -2.241801 | -1.720970 | 0.461974  |
| Si | -2.889948 | 1.280208  | -0.258399 |
| Si | 2.800405  | -1.268547 | -0.307134 |
| O  | 0.110541  | 0.493043  | -2.697123 |
| H  | -1.927676 | -0.437545 | -1.450407 |
| H  | -0.445512 | 0.567379  | -3.469599 |
| C  | -4.064258 | -2.176067 | 0.547309  |
| H  | -4.484934 | -2.308205 | -0.452490 |
| H  | -4.198863 | -3.114755 | 1.091233  |
| H  | -4.654028 | -1.412714 | 1.058975  |
| C  | -1.568602 | -1.506100 | 2.194536  |
| H  | -2.182210 | -0.825802 | 2.786143  |
| H  | -1.550016 | -2.469367 | 2.710567  |
| H  | -0.551166 | -1.113973 | 2.183642  |
| C  | -1.331265 | -3.082194 | -0.450788 |
| H  | -1.664347 | -3.155887 | -1.489268 |
| H  | -0.251691 | -2.930554 | -0.457247 |
| H  | -1.521893 | -4.047151 | 0.025200  |
| C  | 2.290468  | -2.198511 | 1.259601  |
| H  | 2.528138  | -1.607244 | 2.148285  |
| H  | 1.219917  | -2.409388 | 1.287626  |
| H  | 2.818277  | -3.152231 | 1.345918  |
| C  | 2.359704  | -2.350415 | -1.802738 |
| H  | 2.875768  | -2.004763 | -2.705016 |
| H  | 2.682048  | -3.381409 | -1.633118 |
| H  | 1.292533  | -2.368462 | -2.032157 |
| C  | 4.690996  | -1.208466 | -0.295370 |
| H  | 5.103223  | -2.218023 | -0.381329 |
| H  | 5.072264  | -0.622577 | -1.136489 |
| H  | 5.086639  | -0.765993 | 0.619837  |
| C  | 3.903530  | 1.710503  | 1.465970  |
| H  | 4.057560  | 0.870843  | 2.148072  |
| H  | 4.740259  | 1.726563  | 0.764449  |
| H  | 3.946833  | 2.627826  | 2.059934  |
| C  | 2.063987  | 3.199542  | -0.424057 |
| H  | 2.910134  | 3.328889  | -1.107024 |
| H  | 1.146956  | 3.221264  | -1.018883 |
| H  | 2.046804  | 4.074581  | 0.231223  |
| C  | 0.927856  | 1.631199  | 1.939411  |
| H  | -0.088720 | 1.608130  | 1.541003  |
| H  | 1.039001  | 0.762034  | 2.592985  |
| H  | 1.016031  | 2.527774  | 2.558936  |
| C  | -1.863661 | 2.716135  | -0.885015 |
| H  | -1.073279 | 2.979692  | -0.179874 |
| H  | -1.389737 | 2.476253  | -1.839402 |
| H  | -2.492370 | 3.599943  | -1.019548 |
| C  | -4.475367 | 1.164995  | -1.259702 |
| H  | -5.096897 | 0.333131  | -0.921795 |
| H  | -5.063802 | 2.082044  | -1.174216 |
| H  | -4.259462 | 1.011062  | -2.320490 |
| C  | -3.294838 | 1.543650  | 1.553176  |
| H  | -3.972432 | 0.786612  | 1.951628  |
| H  | -2.395832 | 1.556776  | 2.171235  |
| H  | -3.785475 | 2.514081  | 1.665366  |

**5**  
**C1**  
 B3LYP-D3/def2-TZVP  
 E = -1915.29853  
 ZPVE = 0.508769

|    |           |           |           |
|----|-----------|-----------|-----------|
| N  | 2.103425  | 0.129475  | -0.466043 |
| Li | -0.003522 | -0.139224 | -0.793133 |
| Li | -1.801382 | -0.699889 | -2.247278 |
| N  | -1.987331 | -0.162266 | -0.234704 |
| Si | -2.073539 | -1.350497 | 0.996817  |
| Si | 2.567332  | 1.677599  | 0.245618  |
| Si | 2.944148  | -1.410787 | -0.233001 |
| Si | -2.579632 | 1.444263  | -0.101106 |
| O  | -0.061144 | -0.555406 | -2.530737 |
| H  | 1.924186  | 0.239862  | -1.466094 |
| H  | 0.458091  | -0.691834 | -3.320544 |
| C  | 4.408431  | 2.011309  | 0.055171  |
| H  | 4.701232  | 2.018219  | -0.997539 |
| H  | 4.666090  | 2.985784  | 0.478488  |
| H  | 5.016117  | 1.260771  | 0.565053  |
| C  | 2.119744  | 1.683063  | 2.063809  |
| H  | 2.762325  | 1.019612  | 2.643925  |
| H  | 2.228261  | 2.690826  | 2.472739  |
| H  | 1.087662  | 1.367591  | 2.220695  |
| C  | 1.621608  | 3.008977  | -0.675582 |
| H  | 1.794166  | 2.947199  | -1.752989 |
| H  | 0.546184  | 2.947868  | -0.507188 |
| H  | 1.947394  | 3.998456  | -0.345584 |
| C  | -1.860930 | 2.387838  | 1.373096  |
| H  | -2.140423 | 1.907375  | 2.314724  |
| H  | -0.770959 | 2.434774  | 1.343629  |
| H  | -2.234778 | 3.414810  | 1.404314  |
| C  | -2.165977 | 2.399291  | -1.682607 |
| H  | -2.768131 | 2.033551  | -2.520261 |
| H  | -2.399503 | 3.460411  | -1.561194 |
| H  | -1.118426 | 2.319858  | -1.979733 |
| C  | -4.460290 | 1.549483  | 0.065966  |
| H  | -4.785626 | 2.593753  | 0.054482  |
| H  | -4.961369 | 1.044590  | -0.764481 |
| H  | -4.817121 | 1.102569  | 0.995078  |
| C  | -3.638569 | -1.299474 | 2.056668  |
| H  | -3.708843 | -0.374739 | 2.634316  |
| H  | -4.544336 | -1.378308 | 1.450136  |
| H  | -3.641224 | -2.131460 | 2.766551  |
| C  | -2.024163 | -3.074658 | 0.214321  |
| H  | -2.955104 | -3.289248 | -0.318928 |
| H  | -1.205215 | -3.181786 | -0.500528 |
| H  | -1.902814 | -3.850447 | 0.974854  |
| C  | -0.628856 | -1.228034 | 2.215780  |
| H  | 0.343963  | -1.235664 | 1.720578  |
| H  | -0.693258 | -0.297681 | 2.785171  |
| H  | -0.638465 | -2.056306 | 2.929492  |
| C  | 1.778735  | -2.827385 | -0.612241 |
| H  | 1.047332  | -2.970772 | 0.184792  |
| H  | 1.232609  | -2.645302 | -1.540764 |
| H  | 2.338439  | -3.760487 | -0.715692 |
| C  | 4.410120  | -1.496877 | -1.405176 |
| H  | 5.113704  | -0.681641 | -1.224965 |
| H  | 4.950413  | -2.440305 | -1.292696 |
| H  | 4.079826  | -1.429348 | -2.445303 |
| C  | 3.531804  | -1.543036 | 1.542709  |
| H  | 4.282747  | -0.793441 | 1.797590  |
| H  | 2.705248  | -1.450522 | 2.249175  |
| H  | 3.985950  | -2.525977 | 1.692653  |
| O  | -3.700118 | -1.130127 | -2.303986 |
| H  | -4.216671 | -1.939772 | -2.352545 |
| H  | -3.583783 | -0.902760 | -1.355234 |



**6**  
**C1**  
 B3LYP-D3/def2-TZVP  
 E = -1915.304171  
 ZPVE = 0.506925

|    |           |           |           |
|----|-----------|-----------|-----------|
| N  | 2.937078  | -0.193867 | 0.623738  |
| Li | 0.868387  | -0.388419 | 0.897894  |
| Li | -1.623542 | 0.302841  | 1.925336  |
| N  | -2.619679 | 0.022532  | 0.310637  |
| Si | -2.926899 | 1.530761  | -0.432411 |
| Si | 3.457370  | -1.594829 | -0.319556 |
| Si | 3.178078  | 1.523339  | 0.249618  |
| Si | -3.579007 | -1.393730 | 0.233943  |
| O  | 0.067492  | 0.177516  | 2.389120  |
| H  | 3.133174  | -0.346388 | 1.610939  |
| H  | 0.466583  | 0.304306  | 3.248788  |
| C  | 5.280026  | -1.937606 | -0.030747 |
| H  | 5.484561  | -2.119909 | 1.027584  |
| H  | 5.607077  | -2.820766 | -0.585506 |
| H  | 5.896149  | -1.093977 | -0.348491 |
| C  | 3.152531  | -1.245383 | -2.134762 |
| H  | 3.731394  | -0.394139 | -2.497456 |
| H  | 3.442852  | -2.115991 | -2.727820 |
| H  | 2.097937  | -1.047909 | -2.332013 |
| C  | 2.440632  | -3.068169 | 0.237408  |
| H  | 2.532528  | -3.236619 | 1.313887  |
| H  | 1.381745  | -2.930874 | 0.004455  |
| H  | 2.775566  | -3.979440 | -0.264285 |
| C  | -3.994476 | -1.895196 | -1.542109 |
| H  | -4.575034 | -1.120535 | -2.050182 |
| H  | -3.082375 | -2.058670 | -2.122613 |
| H  | -4.578623 | -2.819031 | -1.572533 |
| C  | -2.613315 | -2.822233 | 1.007313  |
| H  | -2.383094 | -2.637217 | 2.061064  |
| H  | -3.178575 | -3.756542 | 0.956542  |
| H  | -1.665303 | -2.969834 | 0.484493  |
| C  | -5.210660 | -1.235371 | 1.173121  |
| H  | -5.776830 | -2.170598 | 1.142379  |
| H  | -5.036990 | -0.987656 | 2.224224  |
| H  | -5.839937 | -0.450025 | 0.749138  |
| C  | -4.752778 | 1.998935  | -0.541219 |
| H  | -5.313705 | 1.282266  | -1.146195 |
| H  | -5.216184 | 2.029838  | 0.447735  |
| H  | -4.874355 | 2.984427  | -0.999236 |
| C  | -2.052609 | 2.899167  | 0.547190  |
| H  | -2.513291 | 3.055537  | 1.528106  |
| H  | -0.994336 | 2.672205  | 0.709231  |
| H  | -2.102614 | 3.853210  | 0.015671  |
| C  | -2.229755 | 1.600408  | -2.192312 |
| H  | -1.139236 | 1.519659  | -2.188653 |
| H  | -2.627012 | 0.783041  | -2.799993 |
| H  | -2.484411 | 2.540300  | -2.689326 |
| C  | 1.952790  | 2.040611  | -1.070253 |
| H  | 2.091701  | 1.482103  | -1.997293 |
| H  | 0.921550  | 1.895558  | -0.744086 |
| H  | 2.080836  | 3.101160  | -1.300961 |
| C  | 2.855149  | 2.451645  | 1.842233  |
| H  | 3.572780  | 2.177000  | 2.620127  |
| H  | 2.934283  | 3.530057  | 1.686805  |
| H  | 1.849816  | 2.229857  | 2.208653  |
| C  | 4.925809  | 1.853250  | -0.357678 |
| H  | 5.666131  | 1.550697  | 0.386666  |
| H  | 5.145817  | 1.317530  | -1.283916 |
| H  | 5.067367  | 2.919200  | -0.554193 |
| O  | -0.241988 | -0.730075 | -0.554039 |
| H  | -1.216542 | -0.449742 | -0.280981 |
| H  | -0.175399 | -0.603470 | -1.503142 |

**7**  
 Ci  
 B3LYP-D3/def2-TZVP  
 E = -1915.316764  
 ZPVE = 0.508587

|    |           |           |           |
|----|-----------|-----------|-----------|
| Li | 0.990658  | -0.352686 | -0.496336 |
| Li | -0.990658 | 0.352686  | 0.496336  |
| O  | 0.258901  | -0.772719 | 1.128925  |
| H  | 0.228501  | -1.461115 | 1.790387  |
| O  | -0.258901 | 0.772719  | -1.128925 |
| H  | -2.326112 | 0.191305  | -1.009305 |
| H  | -0.228501 | 1.461115  | -1.790387 |
| H  | 2.326112  | -0.191305 | 1.009305  |
| N  | -2.967637 | 0.019129  | -0.227401 |
| N  | 2.967637  | -0.019129 | 0.227401  |
| Si | 4.010841  | -1.400720 | -0.038926 |
| Si | 3.351881  | 1.691487  | 0.083849  |
| Si | -4.010841 | 1.400720  | 0.038926  |
| Si | -3.351881 | -1.691487 | -0.083849 |
| C  | 2.926567  | -2.911782 | -0.310427 |
| H  | 3.531143  | -3.821141 | -0.354674 |
| H  | 2.204869  | -3.025928 | 0.501602  |
| H  | 2.364870  | -2.848216 | -1.246643 |
| C  | 5.119737  | -1.705759 | 1.446350  |
| H  | 5.757584  | -0.841069 | 1.641597  |
| H  | 4.525015  | -1.889225 | 2.344954  |
| H  | 5.765595  | -2.574075 | 1.292015  |
| C  | 5.064075  | -1.092014 | -1.561077 |
| H  | 5.676990  | -1.971794 | -1.772567 |
| H  | 4.447428  | -0.895754 | -2.440622 |
| H  | 5.740846  | -0.245383 | -1.429039 |
| C  | 5.014732  | 2.086965  | 0.872120  |
| H  | 5.017961  | 1.822123  | 1.932185  |
| H  | 5.831671  | 1.543658  | 0.391222  |
| H  | 5.238406  | 3.154103  | 0.792940  |
| C  | 1.990495  | 2.642285  | 0.950402  |
| H  | 2.215549  | 3.711424  | 0.970386  |
| H  | 1.045224  | 2.496812  | 0.422731  |
| H  | 1.860753  | 2.304399  | 1.981187  |
| C  | 3.405227  | 2.163435  | -1.731590 |
| H  | 4.186335  | 1.626874  | -2.273123 |
| H  | 2.447429  | 1.939654  | -2.206728 |
| H  | 3.597050  | 3.233495  | -1.845954 |
| C  | -3.405227 | -2.163435 | 1.731590  |
| H  | -4.186335 | -1.626874 | 2.273123  |
| H  | -3.597050 | -3.233495 | 1.845954  |
| H  | -2.447429 | -1.939654 | 2.206728  |
| C  | -1.990495 | -2.642285 | -0.950402 |
| H  | -2.215549 | -3.711424 | -0.970386 |
| H  | -1.860753 | -2.304399 | -1.981187 |
| H  | -1.045224 | -2.496812 | -0.422731 |
| C  | -5.014732 | -2.086965 | -0.872120 |
| H  | -5.017961 | -1.822123 | -1.932185 |
| H  | -5.238406 | -3.154103 | -0.792940 |
| H  | -5.831671 | -1.543658 | -0.391222 |
| C  | -2.926567 | 2.911782  | 0.310427  |
| H  | -2.204869 | 3.025928  | -0.501602 |
| H  | -3.531143 | 3.821141  | 0.354674  |
| H  | -2.364870 | 2.848216  | 1.246643  |
| C  | -5.064075 | 1.092014  | 1.561077  |
| H  | -5.740846 | 0.245383  | 1.429039  |
| H  | -4.447428 | 0.895754  | 2.440622  |
| H  | -5.676990 | 1.971794  | 1.772567  |
| C  | -5.119737 | 1.705759  | -1.446350 |
| H  | -4.525015 | 1.889225  | -2.344954 |
| H  | -5.757584 | 0.841069  | -1.641597 |
| H  | -5.765595 | 2.574075  | -1.292015 |

**TS(1→2)**  
C1  
B3LYP-D3/def2-TZVP  
E = -1838.786897  
ZPVE = 0.482545

|    |           |           |           |
|----|-----------|-----------|-----------|
| N  | 1.677427  | -0.074156 | 0.071727  |
| Li | -0.457717 | 0.062474  | 1.580046  |
| Si | 2.623345  | 1.325471  | 0.388010  |
| Si | 2.190987  | -1.496704 | -0.730623 |
| N  | -1.721318 | 0.098546  | 0.117512  |
| Li | -0.035322 | 0.028591  | -0.874809 |
| Si | -2.715906 | -1.278285 | 0.367997  |
| Si | -2.271424 | 1.606173  | -0.486205 |
| O  | 0.939642  | -0.654153 | 2.582757  |
| H  | 1.136845  | -1.507237 | 2.977820  |
| H  | 1.436725  | -0.585785 | 1.694745  |
| C  | -0.957569 | 2.252658  | -1.704865 |
| H  | 0.040264  | 2.353792  | -1.268696 |
| H  | -0.881097 | 1.615841  | -2.594945 |
| H  | -1.230694 | 3.246530  | -2.066630 |
| C  | -3.879122 | 1.562812  | -1.471522 |
| H  | -4.721930 | 1.197926  | -0.881333 |
| H  | -4.130967 | 2.570219  | -1.814015 |
| H  | -3.789756 | 0.925488  | -2.353825 |
| C  | -2.480386 | 2.893449  | 0.876169  |
| H  | -2.784607 | 3.862667  | 0.472122  |
| H  | -3.250676 | 2.571943  | 1.582474  |
| H  | -1.558026 | 3.049948  | 1.441245  |
| C  | -3.365568 | -2.048033 | -1.227861 |
| H  | -4.059537 | -1.379196 | -1.740115 |
| H  | -2.552972 | -2.276828 | -1.922180 |
| H  | -3.896763 | -2.981083 | -1.020689 |
| C  | -1.708266 | -2.627051 | 1.240465  |
| H  | -0.842818 | -2.941040 | 0.652535  |
| H  | -1.346151 | -2.319911 | 2.226307  |
| H  | -2.333364 | -3.510204 | 1.395481  |
| C  | -4.197649 | -0.923328 | 1.484341  |
| H  | -4.783700 | -1.828113 | 1.666891  |
| H  | -3.871676 | -0.538140 | 2.454696  |
| H  | -4.867565 | -0.180291 | 1.046047  |
| C  | 2.388977  | -2.945173 | 0.464479  |
| H  | 3.167019  | -2.725956 | 1.201423  |
| H  | 1.461637  | -3.150773 | 1.004409  |
| H  | 2.677236  | -3.861760 | -0.056178 |
| C  | 3.782327  | -1.371382 | -1.732770 |
| H  | 4.634082  | -1.084366 | -1.112610 |
| H  | 4.017081  | -2.338334 | -2.186231 |
| H  | 3.696107  | -0.639734 | -2.538762 |
| C  | 0.831528  | -1.981088 | -1.980074 |
| H  | -0.150074 | -2.152061 | -1.525602 |
| H  | 0.718834  | -1.234648 | -2.776695 |
| H  | 1.095400  | -2.915525 | -2.480124 |
| C  | 3.195150  | 2.220177  | -1.173262 |
| H  | 3.686429  | 3.164036  | -0.921330 |
| H  | 3.909207  | 1.617158  | -1.737500 |
| H  | 2.358744  | 2.450300  | -1.838148 |
| C  | 1.595298  | 2.553121  | 1.395264  |
| H  | 0.715323  | 2.908606  | 0.854706  |
| H  | 1.267469  | 2.111238  | 2.341136  |
| H  | 2.191363  | 3.434145  | 1.646815  |
| C  | 4.150578  | 0.933303  | 1.426499  |
| H  | 4.819013  | 0.236460  | 0.915470  |
| H  | 4.724566  | 1.835923  | 1.652634  |
| H  | 3.858431  | 0.478086  | 2.376520  |

**TS(2→3)**  
C1  
B3LYP-D3/def2-TZVP  
E = -1838.789684  
ZPVE = 0.479379

|    |           |           |           |
|----|-----------|-----------|-----------|
| N  | -1.761723 | -0.082995 | -0.080462 |
| Li | 0.074107  | 0.001282  | 0.576819  |
| Li | 1.046799  | -0.087505 | -1.960119 |
| N  | 1.877428  | 0.105883  | -0.230169 |
| Si | 2.876850  | -1.288187 | -0.215378 |
| Si | -2.730197 | 1.338517  | -0.235712 |
| Si | -2.311095 | -1.600917 | 0.519265  |
| Si | 2.274135  | 1.659443  | 0.378426  |
| O  | -0.659662 | -0.387647 | -2.346532 |
| H  | -1.229733 | -0.282861 | -1.364908 |
| H  | -1.230341 | -0.779968 | -3.009012 |
| C  | -4.299912 | 1.016010  | -1.235559 |
| H  | -4.051532 | 0.647618  | -2.234692 |
| H  | -4.888438 | 1.929327  | -1.356918 |
| H  | -4.941533 | 0.270787  | -0.759667 |
| C  | -3.233240 | 2.065327  | 1.430174  |
| H  | -3.911367 | 1.404737  | 1.973164  |
| H  | -3.741891 | 3.023653  | 1.293539  |
| H  | -2.362731 | 2.242299  | 2.067019  |
| C  | -1.752682 | 2.654929  | -1.167960 |
| H  | -1.371633 | 2.252202  | -2.108959 |
| H  | -0.903655 | 3.031366  | -0.594149 |
| H  | -2.390616 | 3.511655  | -1.400190 |
| C  | 0.978336  | 2.134552  | 1.689872  |
| H  | 1.045059  | 1.481545  | 2.567111  |
| H  | -0.055524 | 2.120341  | 1.331472  |
| H  | 1.151930  | 3.153451  | 2.044153  |
| C  | 2.228485  | 2.964439  | -0.983256 |
| H  | 3.014377  | 2.769522  | -1.718836 |
| H  | 2.395312  | 3.968455  | -0.584161 |
| H  | 1.270754  | 2.979259  | -1.509373 |
| C  | 3.944020  | 1.816967  | 1.239803  |
| H  | 4.021907  | 2.798271  | 1.715919  |
| H  | 4.772454  | 1.727202  | 0.535048  |
| H  | 4.080897  | 1.061651  | 2.017070  |
| C  | 4.635365  | -0.997300 | -0.840529 |
| H  | 5.231647  | -0.421915 | -0.130916 |
| H  | 4.639304  | -0.457813 | -1.791811 |
| H  | 5.144297  | -1.952109 | -0.999426 |
| C  | 2.122482  | -2.558444 | -1.411811 |
| H  | 2.183235  | -2.239728 | -2.460022 |
| H  | 1.075656  | -2.787708 | -1.200156 |
| H  | 2.680753  | -3.496178 | -1.353155 |
| C  | 3.026926  | -2.098823 | 1.481243  |
| H  | 2.060180  | -2.413019 | 1.879292  |
| H  | 3.469902  | -1.402145 | 2.197733  |
| H  | 3.671487  | -2.981039 | 1.439610  |
| C  | -0.881097 | -2.433324 | 1.446710  |
| H  | -0.544443 | -1.850147 | 2.311521  |
| H  | -0.018370 | -2.619199 | 0.802619  |
| H  | -1.193523 | -3.406058 | 1.834674  |
| C  | -2.800862 | -2.753466 | -0.889332 |
| H  | -3.628974 | -2.331737 | -1.464919 |
| H  | -3.114721 | -3.733761 | -0.521844 |
| H  | -1.960906 | -2.904222 | -1.572130 |
| C  | -3.745565 | -1.503800 | 1.737413  |
| H  | -4.635459 | -1.051528 | 1.295096  |
| H  | -3.479927 | -0.920530 | 2.621747  |
| H  | -4.018417 | -2.508427 | 2.072002  |

**TS(3→4)**  
C1  
B3LYP-D3/def2-TZVP  
E = -1838.794162  
ZPVE = 0.482527

|    |           |           |           |
|----|-----------|-----------|-----------|
| N  | -1.869652 | -0.101009 | -0.179241 |
| Li | 1.120530  | 0.125854  | -2.062100 |
| Si | -2.844326 | 1.357226  | -0.107214 |
| Si | -2.260933 | -1.716872 | 0.377345  |
| C  | -4.466646 | 1.146183  | -1.032950 |
| H  | -5.108486 | 0.390366  | -0.577090 |
| H  | -5.025274 | 2.085507  | -1.056916 |
| H  | -4.275159 | 0.846222  | -2.066288 |
| C  | -3.193638 | 1.808501  | 1.684042  |
| H  | -2.270958 | 1.899093  | 2.262320  |
| H  | -3.708171 | 2.771593  | 1.735763  |
| H  | -3.828918 | 1.072203  | 2.179285  |
| C  | -1.867622 | 2.721883  | -0.944838 |
| H  | -1.454740 | 2.342304  | -1.882738 |
| H  | -2.508715 | 3.578926  | -1.164866 |
| H  | -1.038838 | 3.082348  | -0.333026 |
| C  | -3.951602 | -1.859248 | 1.180139  |
| H  | -4.060460 | -1.205175 | 2.046699  |
| H  | -4.755665 | -1.631032 | 0.478891  |
| H  | -4.097677 | -2.886458 | 1.525074  |
| C  | -2.135157 | -2.885281 | -1.079246 |
| H  | -2.979274 | -2.736898 | -1.757258 |
| H  | -1.223750 | -2.686970 | -1.646666 |
| H  | -2.134671 | -3.931114 | -0.763420 |
| C  | -0.984731 | -2.182326 | 1.693211  |
| H  | -1.161263 | -3.194782 | 2.064316  |
| H  | 0.044221  | -2.175662 | 1.321529  |
| H  | -1.040743 | -1.509543 | 2.554685  |
| N  | 1.886737  | 0.109689  | -0.256239 |
| Li | 0.058055  | 0.003878  | 0.383308  |
| Si | 2.857521  | -1.301205 | -0.143868 |
| Si | 2.281233  | 1.675165  | 0.318026  |
| C  | 3.158845  | -1.866976 | 1.634424  |
| H  | 2.223414  | -2.058874 | 2.166070  |
| H  | 3.744532  | -2.790145 | 1.656700  |
| H  | 3.710673  | -1.114375 | 2.202466  |
| C  | 1.998297  | -2.728123 | -1.043552 |
| H  | 1.823871  | -2.512267 | -2.102005 |
| H  | 2.621382  | -3.625394 | -0.998006 |
| H  | 1.029928  | -2.982185 | -0.607579 |
| C  | 4.002568  | 1.905553  | 1.051031  |
| H  | 4.210366  | 1.194005  | 1.852646  |
| H  | 4.781036  | 1.794425  | 0.293877  |
| H  | 4.093112  | 2.911346  | 1.470596  |
| C  | 2.091065  | 2.958355  | -1.055249 |
| H  | 2.839819  | 2.798643  | -1.837256 |
| H  | 1.103123  | 2.921019  | -1.521869 |
| H  | 2.231358  | 3.973752  | -0.675119 |
| C  | 1.061395  | 2.136771  | 1.705742  |
| H  | 1.202074  | 3.173812  | 2.020663  |
| H  | 0.006393  | 2.057539  | 1.421765  |
| H  | 1.220757  | 1.506698  | 2.586336  |
| C  | 4.550906  | -1.109843 | -0.959954 |
| H  | 5.174429  | -0.383872 | -0.435157 |
| H  | 5.088121  | -2.062196 | -0.967973 |
| H  | 4.457673  | -0.776220 | -1.997567 |
| H  | -1.456858 | -0.146247 | -1.168134 |
| O  | -0.520902 | -0.082076 | -2.512488 |
| H  | -1.015787 | -0.256822 | -3.312962 |
